# Supplementary material
Source: Springer Nature journal article supplement (https://www.springermedizin.de/resource/supplementary/12874_2012_862_MOESM4_ESM.pdf/9433154)

Individuals starting heroin use

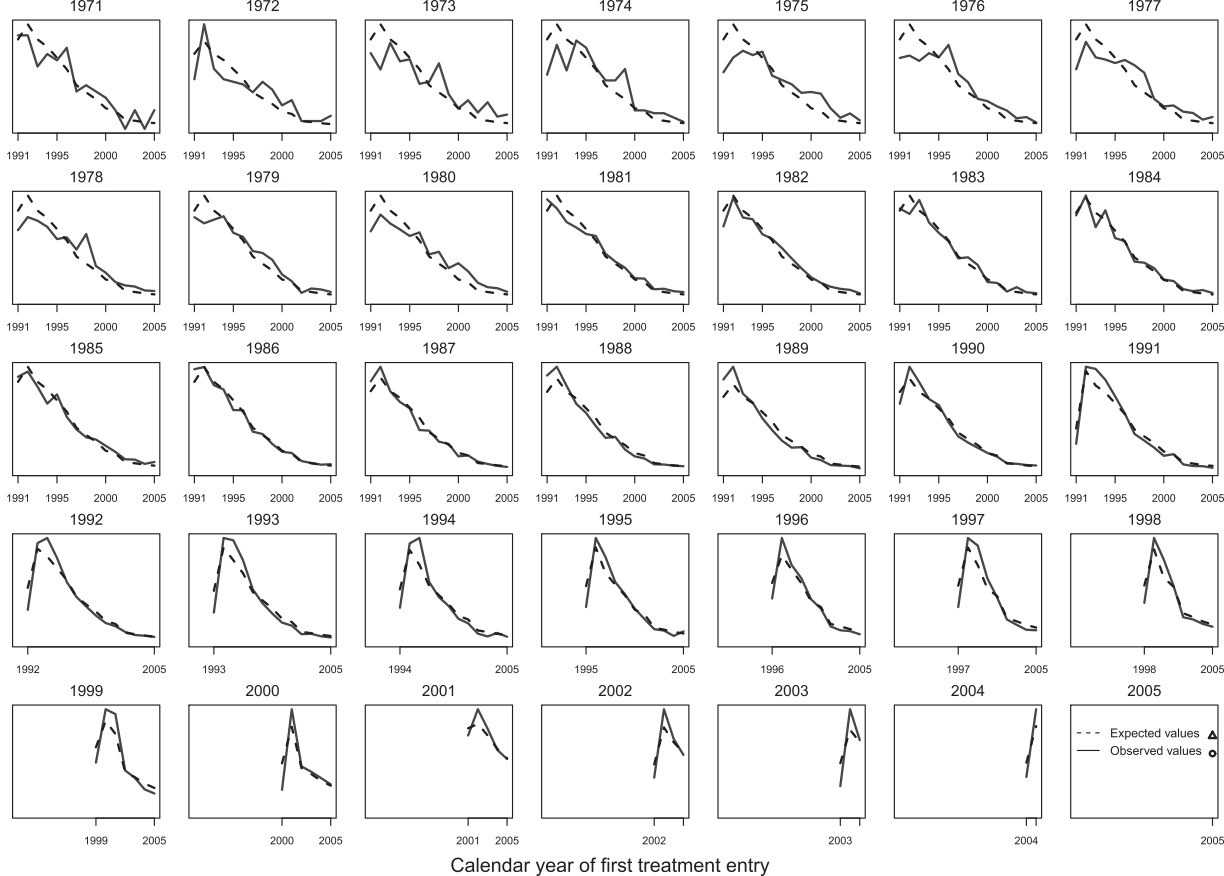

Supplement: MOESM4 [file 9433154]
